# Supplementary material
Source: HighWire-hosted journal article supplement (http://www.jrheum.org/highwire/filestream/29784/field_highwire_adjunct_files/0/160024_Data_Suppl.pdf)
Supplement: 160024_Data_Suppl.pdf [file 160024_Data_Suppl.pdf]

### Supplementary Figure 1.

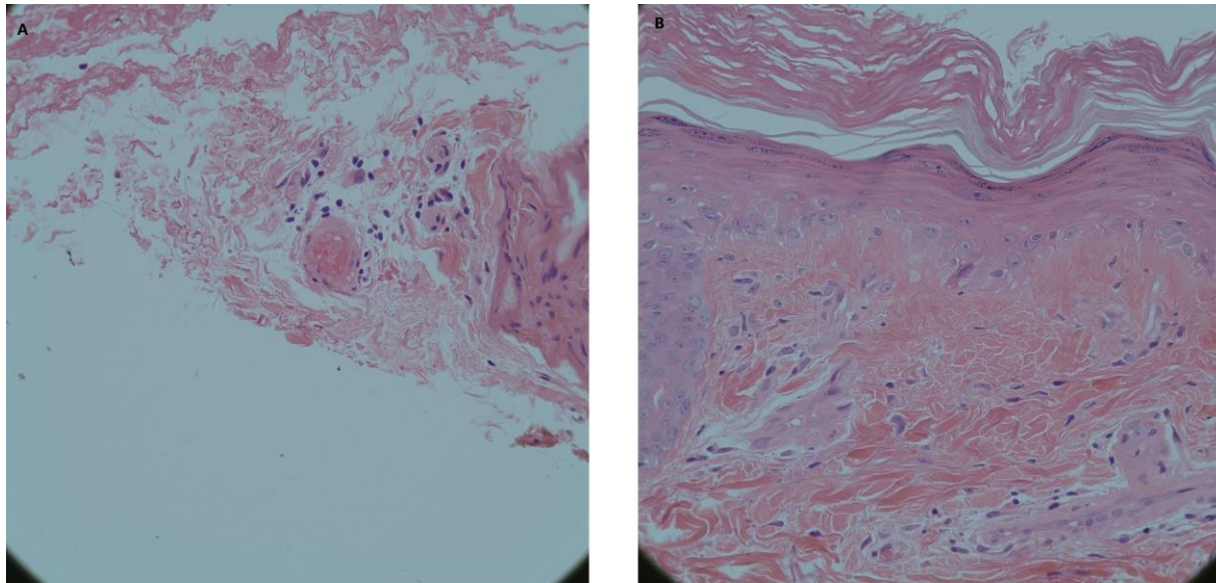

The interface change in nonulcerated areas was adjacent to the vasculopathy.

### Supplementary Figure 2.

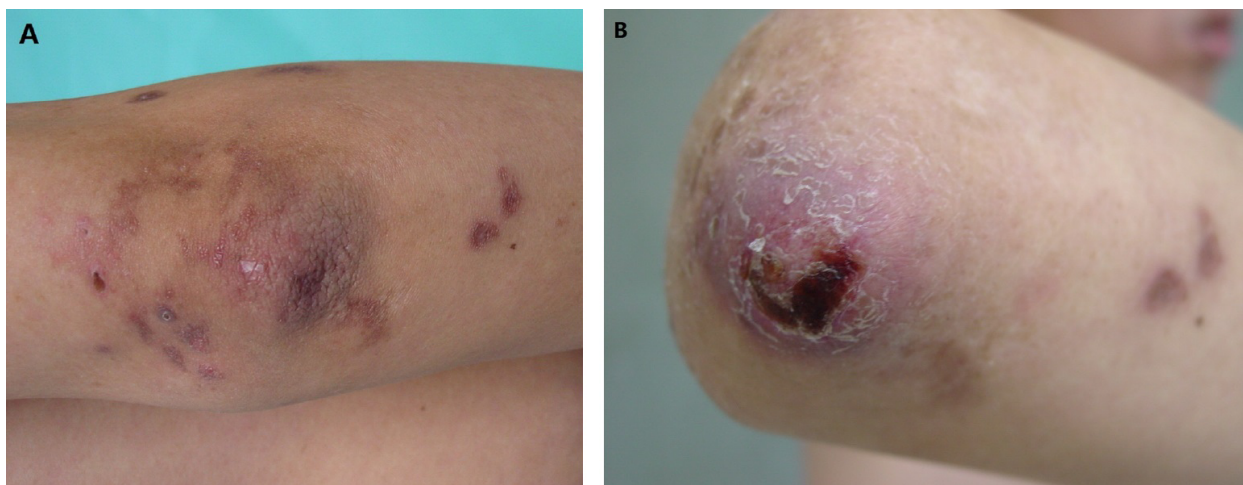

A. CADM patient with Gottron papules involving the elbow joint. B. Three weeks later, the Gottron sign has deep ulceration, even with necrotic crust. CADM: clinically amyopathic dermatomyositis.
